# Supplementary material for: New multiferroic BiFeO3 with large polarization
Source: Royal Society of Chemistry journal article supplement (doi:10.1039/d1cp05452j), 2022-01-01
Supplement: d1cp05452j1.pdf [file d1cp05452j1.pdf]

## Supplementary Information

### New multiferroic BiFeO<sub>3</sub> with large polarization

Runqing Zhang,<sup>a</sup> Peiju Hu,<sup>a</sup> Lingling Bai,<sup>a</sup> Xing Xie,<sup>a</sup> Huafeng Dong,<sup>\*ab</sup> Minru Wen,<sup>a</sup> Zhongfei Mu,<sup>c</sup> Xin Zhang,<sup>a</sup> and Fugen Wu<sup>d</sup>

#### AFFILIATIONS

<sup>a</sup> School of Physics and Optoelectronic Engineering, Guangdong University of Technology, Guangzhou, 510006, China

<sup>b</sup> Guangdong Provincial Key Laboratory of Information Photonics Technology, Guangdong University of Technology, Guangzhou, 510006, China

<sup>c</sup> Experimental Teaching Department, Guangdong University of Technology, Guangzhou, 510006, China

<sup>d</sup> School of Materials and Energy, Guangdong University of Technology, Guangzhou 510006, China

\* Corresponding author. E-mail: [hfdong@gdut.edu.cn](mailto:hfdong@gdut.edu.cn)

**Table S1** Energy (eV/atom) of different crystal structures and magnetic configurations calculated by HSE06 and PBE functional.

| configuration                   | HSE06       | PBE        |
|---------------------------------|-------------|------------|
| <i>P</i> <sub>63</sub> -G-AFM   | -8.7512488  | -6.5477720 |
| <i>P</i> <sub>6322</sub> -G-AFM | -8.7512600  | -6.5480297 |
| <i>R3c</i> -G-AFM               | -8.8657991  | -6.6139328 |
| <i>R3c</i> -A-AFM               | -8.86564431 | -6.6021649 |
| <i>R3c</i> -C-AFM               | -8.86576768 | -6.6022187 |
| <i>R3c</i> -FM                  | -8.82985245 | -6.5691301 |
| <i>R3c</i> -N-FM                | -8.70652646 | -6.4855000 |

**Table S2** The first and second nearest neighbor exchange constants (meV) of *P*<sub>63</sub>-BiFeO<sub>3</sub> and *P*<sub>6322</sub>-BiFeO<sub>3</sub>.

| Structure                | J <sub>1x</sub> | J <sub>1y</sub> | J <sub>1z</sub> | J <sub>2x</sub> | J <sub>2y</sub> | J <sub>2z</sub> |
|--------------------------|-----------------|-----------------|-----------------|-----------------|-----------------|-----------------|
| <i>P</i> <sub>63</sub>   | 22.56           | 22.61           | 22.69           | 2.91            | 3.68            | 3.38            |
| <i>P</i> <sub>6322</sub> | 25.89           | 25.90           | 25.88           | 4.42            | 4.33            | 4.37            |

**Table S3** The elastic stiffness coefficient of *P*<sub>63</sub>-BiFeO<sub>3</sub> and *P*<sub>6322</sub>-BiFeO<sub>3</sub>, the unit of C<sub>ij</sub> is GPa

| structure                | C <sub>11</sub> | C <sub>12</sub> | C <sub>13</sub> | C <sub>33</sub> | C <sub>44</sub> | C <sub>66</sub> |
|--------------------------|-----------------|-----------------|-----------------|-----------------|-----------------|-----------------|
| <i>P</i> <sub>63</sub>   | 168.2           | 150.1           | 82.8            | 229             | 55.6            | 9.1             |
| <i>P</i> <sub>6322</sub> | 169.7           | 150.4           | 83.4            | 229.3           | 56.1            | 9.7             |

**Table S4** Bond lengths (Å) of *R3c*, *P*<sub>63</sub> and *P*<sub>6322</sub>.

| Bond              | $R3c$  | $P6_3$ | $P6_322$ |
|-------------------|--------|--------|----------|
| Fe-O <sub>1</sub> | 2.1185 | 2.0296 | 2.0415   |
| Fe-O <sub>2</sub> | 2.1185 | 2.0297 | 2.0415   |
| Fe-O <sub>3</sub> | 2.1185 | 2.0540 | 2.0415   |
| Fe-O <sub>4</sub> | 1.9942 | 2.0550 | 2.0415   |
| Fe-O <sub>5</sub> | 1.9942 | 2.0290 | 2.0415   |
| Fe-O <sub>6</sub> | 1.9942 | 2.0547 | 2.0415   |
| Bi-O <sub>1</sub> | 2.4802 | 2.3670 | 2.3940   |
| Bi-O <sub>2</sub> | 2.4802 | 2.3661 | 2.3940   |
| Bi-O <sub>3</sub> | 2.4802 | 2.3673 | 2.3940   |
| Bi-O <sub>4</sub> | 2.3345 | 2.4252 | 2.3940   |
| Bi-O <sub>5</sub> | 2.3345 | 2.4259 | 2.3940   |
| Bi-O <sub>6</sub> | 2.3345 | 2.4254 | 2.3940   |

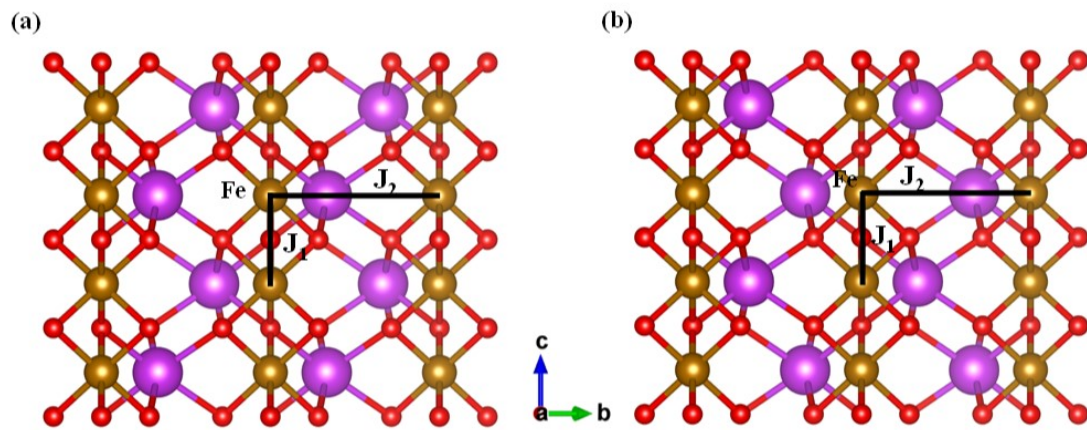

**Fig. S1** Crystal structure of  $P6_3$ -BiFeO<sub>3</sub> (a) and  $P6_322$ -BiFeO<sub>3</sub> (b). The purple, yellow and red spheres represent the Bi, Fe, and O atoms, respectively. Two magnetic exchange constants are marked with  $J_1$  and  $J_2$ .

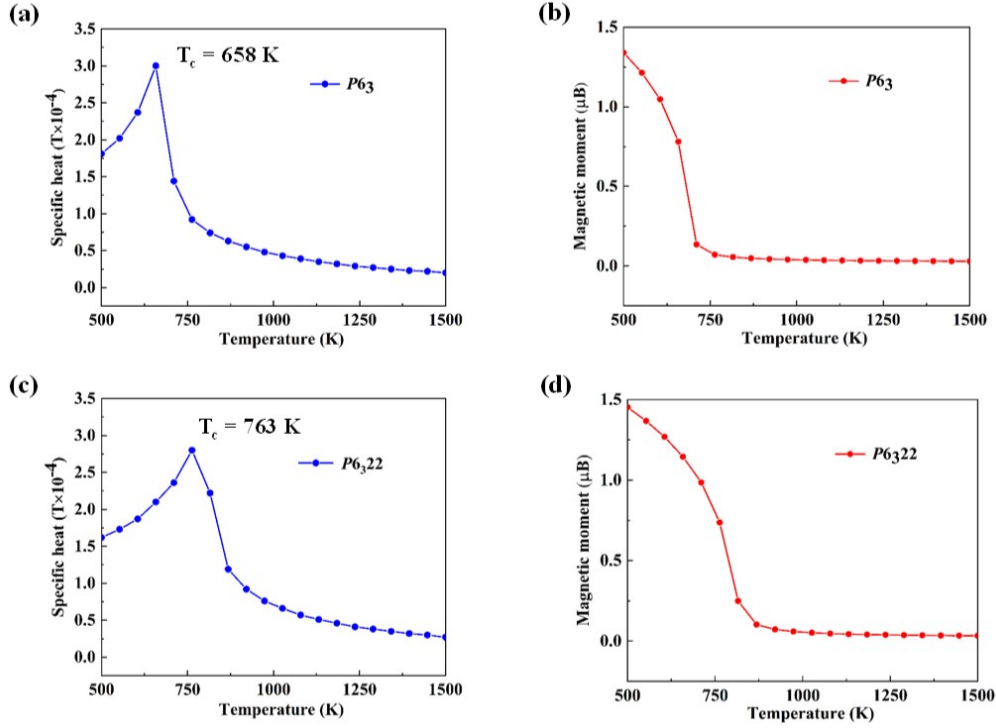

**Fig. S2** Specific heat curves for  $P6_3$ -BiFeO<sub>3</sub> (a) and  $P6_3,22$ -BiFeO<sub>3</sub> (c) were calculated by Monto Carlo simulations. Magnetic moment curves for  $P6_3$ -BiFeO<sub>3</sub> (b) and  $P6_3,22$ -BiFeO<sub>3</sub> (d) were calculated by Monto Carlo simulations.

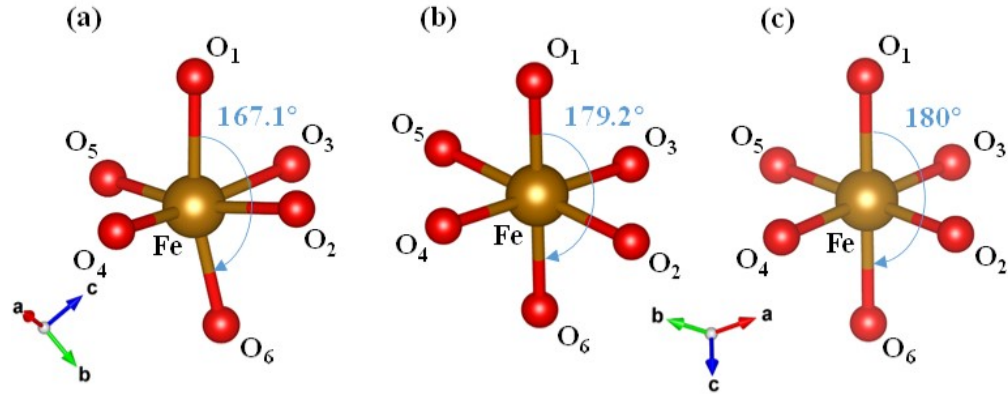

**Fig. S3** The atomic coordination situation of Fe in  $R3c$  (a),  $P6_3$  (b) and  $P6_3,22$  (c).

Firstly, two adjacent Fe-O octahedrons of  $R3c$  are connected by an oxygen atom, while the two adjacent Fe-O octahedrons of  $P6_3$  and  $P6_3,22$  are connected by three oxygen atoms (Fig. 3). Secondly, the  $O_1$ -Fe- $O_6$  angle of  $R3c$  is  $167.1^\circ$ , while the  $O_1$ -Fe- $O_6$  angles of  $P6_3$  and  $P6_3,22$  are  $179.2^\circ$  and  $180^\circ$  (Fig. S3). Thirdly, there are two types of Fe-O bond lengths in  $R3c$ , i.e.,  $2.1185 \text{ \AA}$  (Fe- $O_1$ , Fe- $O_2$ , Fe- $O_3$ ) and  $1.9942 \text{ \AA}$  (Fe- $O_4$ , Fe- $O_5$ , Fe- $O_6$ ), while all the Fe-O bond lengths in  $P6_3,22$  are  $2.0415 \text{ \AA}$  (Table S4). Therefore, the Fe-O octahedron is noncentrosymmetric in  $R3c$ , while the Fe-O octahedron is centrosymmetric in  $P6_3,22$  and almost centrosymmetric in  $P6_3$  (Fig. S3).

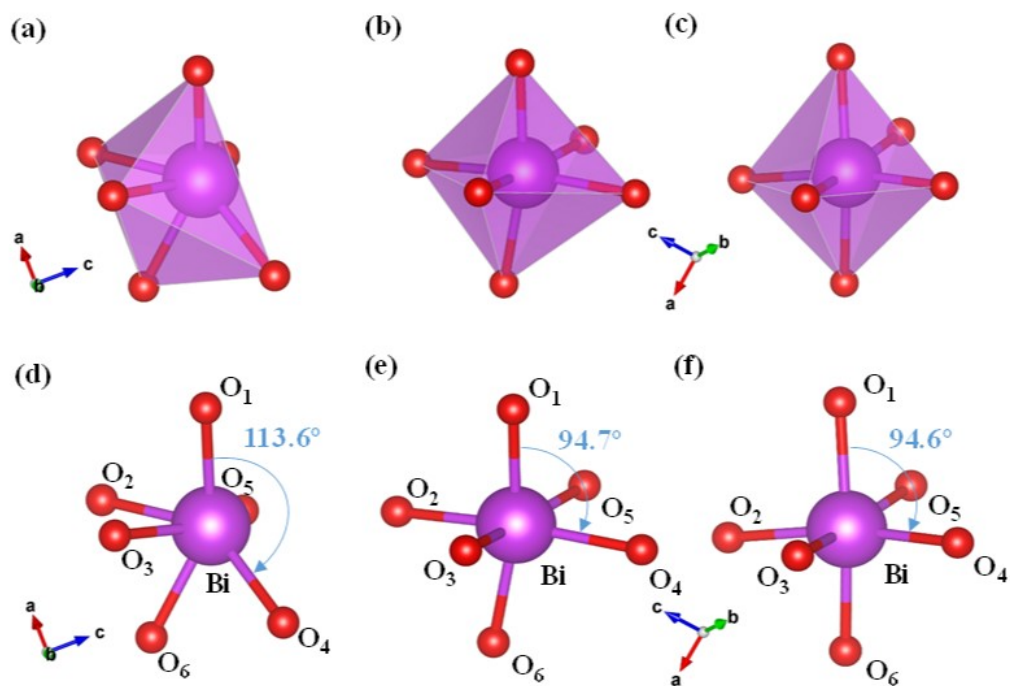

**Fig. S4** The Bi-O octahedrons of *R3c* (a), *P6<sub>3</sub>* (b) and *P6<sub>3</sub>22* (c). The atomic coordination situation of Bi in *R3c* (d), *P6<sub>3</sub>* (e) and *P6<sub>3</sub>22* (f).

For the Bi-O octahedron, firstly, the distribution of Bi-O bond is nonuniform in *R3c*, while it is relatively uniform in *P6<sub>3</sub>* and *P6<sub>3</sub>22* (Fig. S4). Secondly, the O<sub>1</sub>-Bi-O<sub>4</sub> angle of *R3c* is 113.6°, while the O<sub>1</sub>-Bi-O<sub>4</sub> angles of *P6<sub>3</sub>* and *P6<sub>3</sub>22* are 94.7° and 94.6° (Fig. S4). Thirdly, there are two types of Bi-O bond lengths in *R3c*, i.e., 2.4802 Å (Bi-O<sub>1</sub>, Bi-O<sub>2</sub>, Bi-O<sub>3</sub>) and 2.3345 Å (Bi-O<sub>4</sub>, Bi-O<sub>5</sub>, Bi-O<sub>6</sub>), while all the Bi-O bond lengths in *P6<sub>3</sub>22* are 2.3940 Å (Table S4).
